# Supplementary material for: A novel cobalt-free cathode with triple-conduction for proton-conducting solid oxide fuel cells with unprecedented performance
Source: Royal Society of Chemistry journal article supplement (doi:10.1039/c9ta02449b), 2019-01-01
Supplement: c9ta02449b1.pdf [file c9ta02449b1.pdf]

**A novel cobalt-free cathode with triple-conduction for proton-conducting solid oxide fuel cells with unprecedented performance**

Yunpeng Xia,<sup>a</sup> Zongzi Jin,<sup>a</sup> Huiqiang Wang,<sup>\*b</sup> Zheng Gong,<sup>a</sup> Huanlin Lv,<sup>a</sup> Ranran Peng,<sup>a</sup> Wei Liu<sup>\*a</sup> and Lei Bi<sup>\*c</sup>

a. CAS Key Laboratory of Materials for Energy Conversion & Collaborative Innovation Center of Suzhou Nano Science and Technology, University of Science and Technology of China, Hefei 230026, China

E-mail: wliu@ustc.edu.cn (W. Liu)

b. College of Mechanical and Electric Engineering, Hebei Agricultural University, Baoding, Hebei 071001, China

E-mail: whq@hebau.edu.cn (H. Q. Wang)

c. Institute of Materials for Energy and Environment, College of Materials Science and Engineering, Qingdao University, Ningxia Road No.308, Qingdao 266071, China

E-mail: bilei@qdu.edu.cn; bilei81@gmail.com (L. Bi)

\*: Corresponding authors

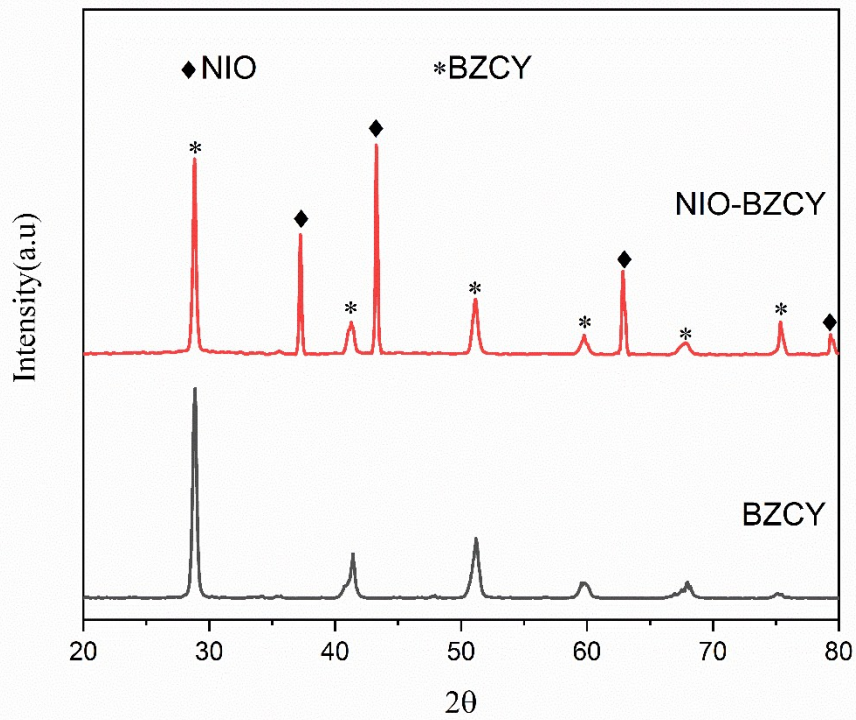

Figure S1. XRD patterns of NiO-BaZr<sub>0.1</sub>Ce<sub>0.7</sub>Y<sub>0.2</sub>O<sub>3- $\delta$</sub>  (NiO-BZCY) and BaZr<sub>0.1</sub>Ce<sub>0.7</sub>Y<sub>0.2</sub>O<sub>3- $\delta$</sub>  (BZCY) powders fired at 1000 °C for 3 h.

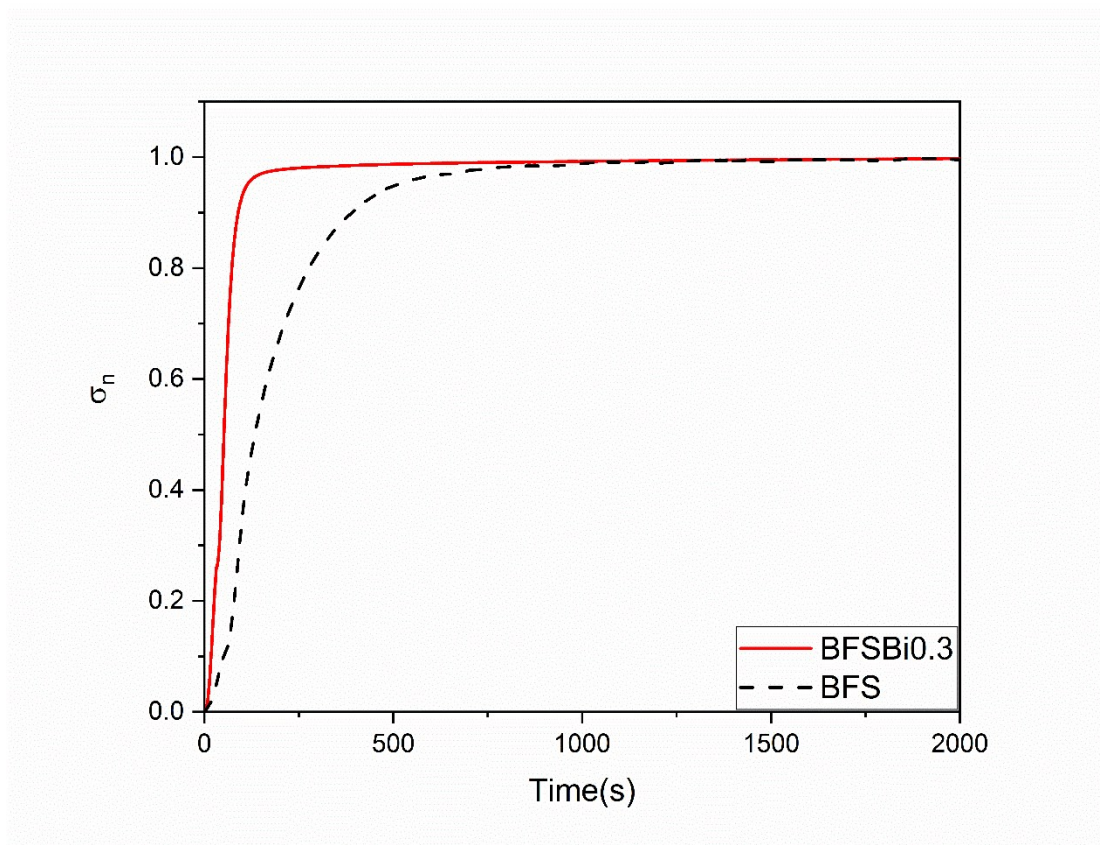

Figure S2. The ECR response of BFS and BFSBi0.3 at 700 °C.

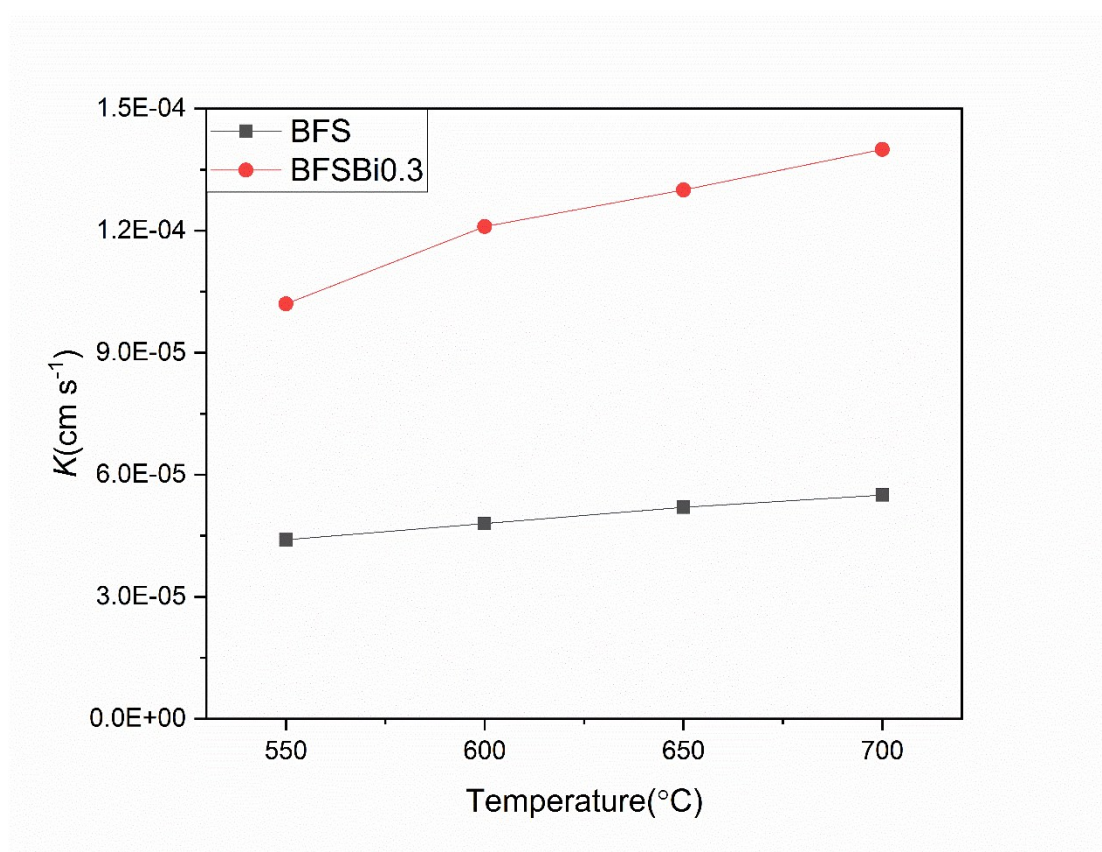

Figure S3. The chemical surface exchange coefficient ( $K_{\text{chem}}$ ) for BFS and BFSBi0.3 from 550 to 700 $^{\circ}\text{C}$ .

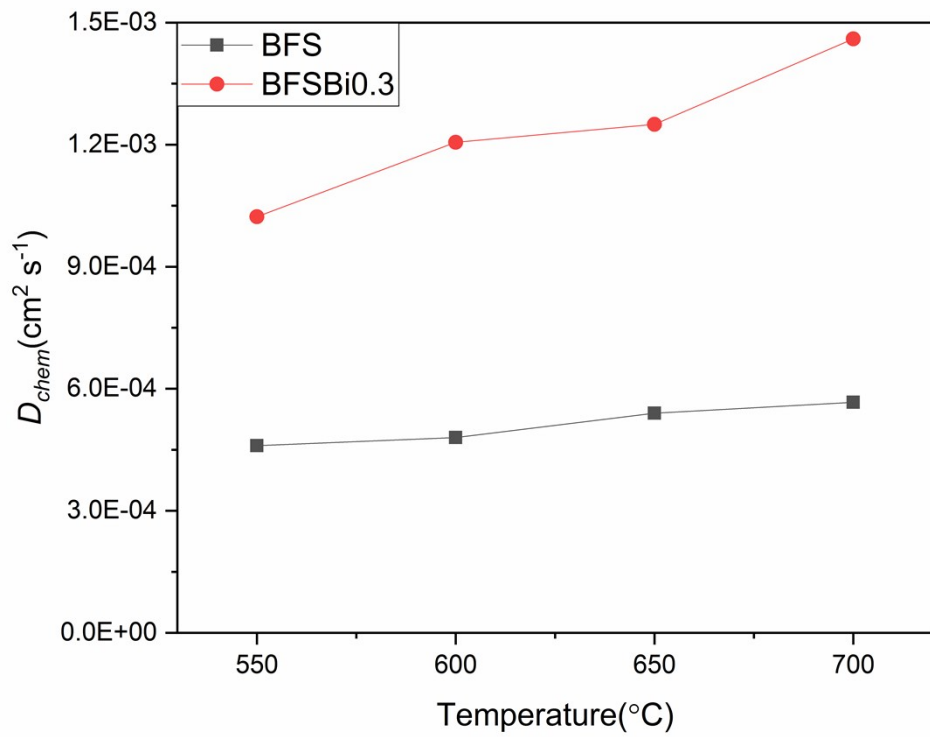

Figure S4. The chemical diffusion coefficient ( $D_{chem}$ ) for BFS and BFSBi0.3 from 550 to 700 $^{\circ}\text{C}$ .
